# Supplementary material for: Concentration Dependent Influence of Lipopolysaccharides on Separation of Hoof Explants and Supernatant Lactic Acid Concentration in an Ex Vivo/In Vitro Laminitis Model
Source: PLoS One. 2015 Nov 24;10(11):e0143754. doi: 10.1371/journal.pone.0143754 (PMC4657978; doi:10.1371/journal.pone.0143754)
Supplement: S1 File — Average values of viability of epidermal and dermal cells incubated with LPS [0–100 μg/mL). Average values of viability and separation force of explants incubated with LPS [0–100 μg/mL). (XLSX) [file pone.0143754.s001.xlsx]

## Sheet: Viability explants
Treatment	Average	SD
Control	1.2692	0.388233
5 µg	1.26902	0.328762
10 µg	1.23097	0.301774
100 µg	1.25809	0.344867

## Sheet: Viabilty EC
Treatment	Average	SD
Control	0.943	0.2302
2.5 µg/mL LPS	0.9595	0.2638
5 µg/mL LPS	0.9805	0.2787
10 µg/mL LPS	1.012	0.2851
100 µg/mL LPS	0.9683	0.3108

## Sheet: Viability DC
Treatment	Average	SD
Control	0.9963	0.05001
2.5 µg/mL LPS	1.074	0.1072
5 µg/mL LPS	1.047	0.1076
10 µg/mL LPS	1.125	0.1318
100 µg/mL LPS	1.152	0.1655

## Sheet: Separation force
Treatment	Average	SD
Control	22.35	7.79
2.5 µg/mL LPS	18.56	5.878
5 µg/mL LPS	15.52	4.466
10 µg/mL LPS	12.21	5.65
100 µg/mL LPS	9.838	2.171
